# Supplementary material
Source: Springer Nature journal article supplement (https://www.springermedizin.de/resource/supplementary/12958_2009_594_MOESM1_ESM.pdf/9568054)

Nodal

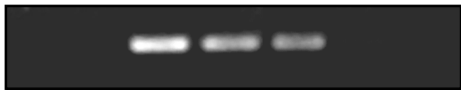

-200

Lefty

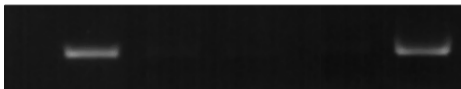

-200

Cripto

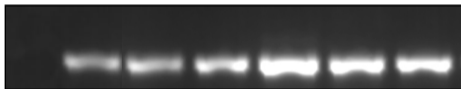

-500

$\beta$ -Actin

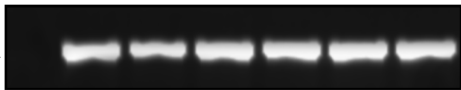

-500

- Mens EP LP ES MS LS

Supplement: MOESM1 [file 9568054]
